# Supplementary material
Source: PubMed Central journal article supplement (PMC5130137)

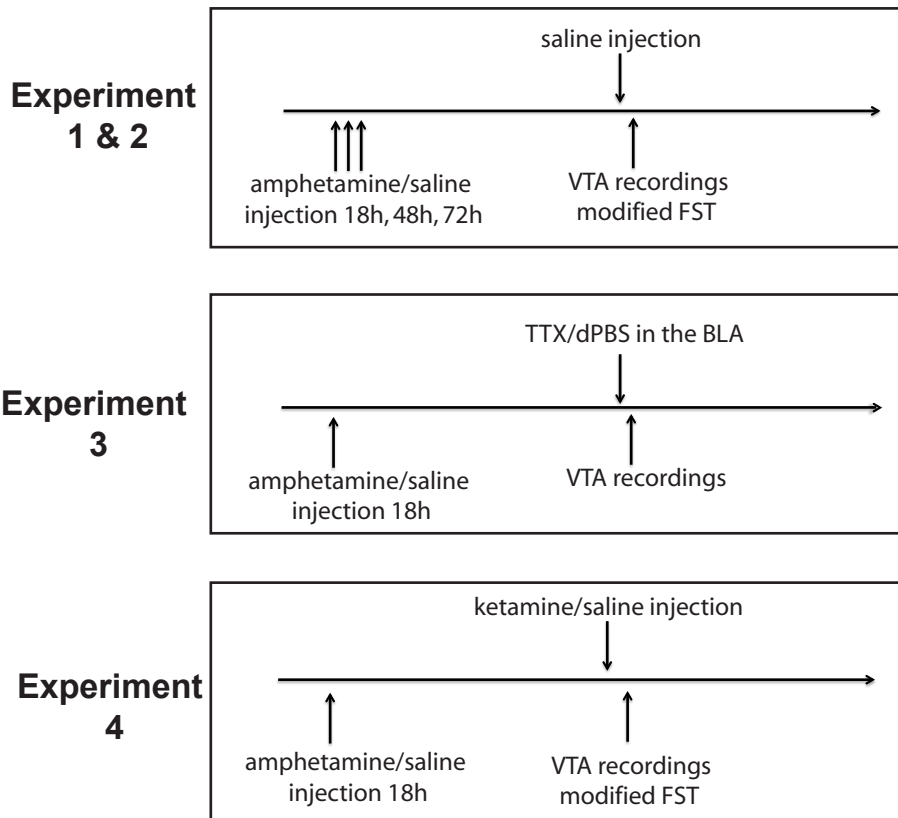

figure S1. Experimental timeline

Supplement: npp2015191x1.pdf [file npp2015191x1.pdf]
